# Supplementary material
Source: MDPI journal article supplement (https://www.mdpi.com/2073-4395/14/3/537)
Supplement: s1 [file s1]

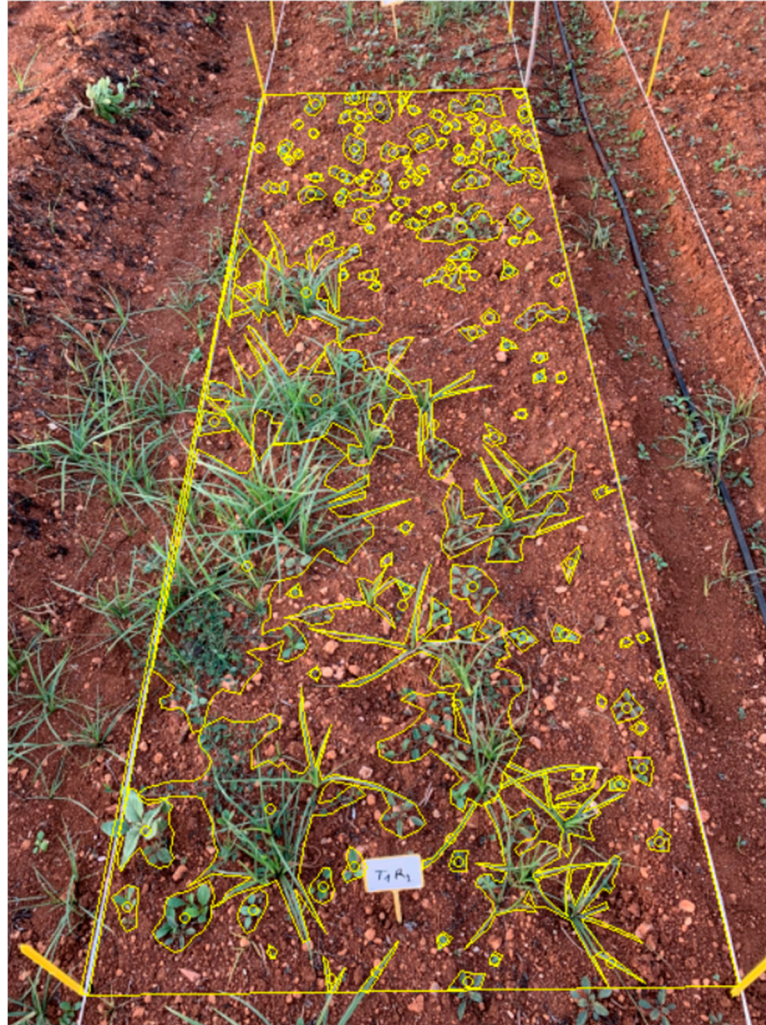

**Figure S1.** Image of a plot processed with Digimizer to measure the weed coverage.

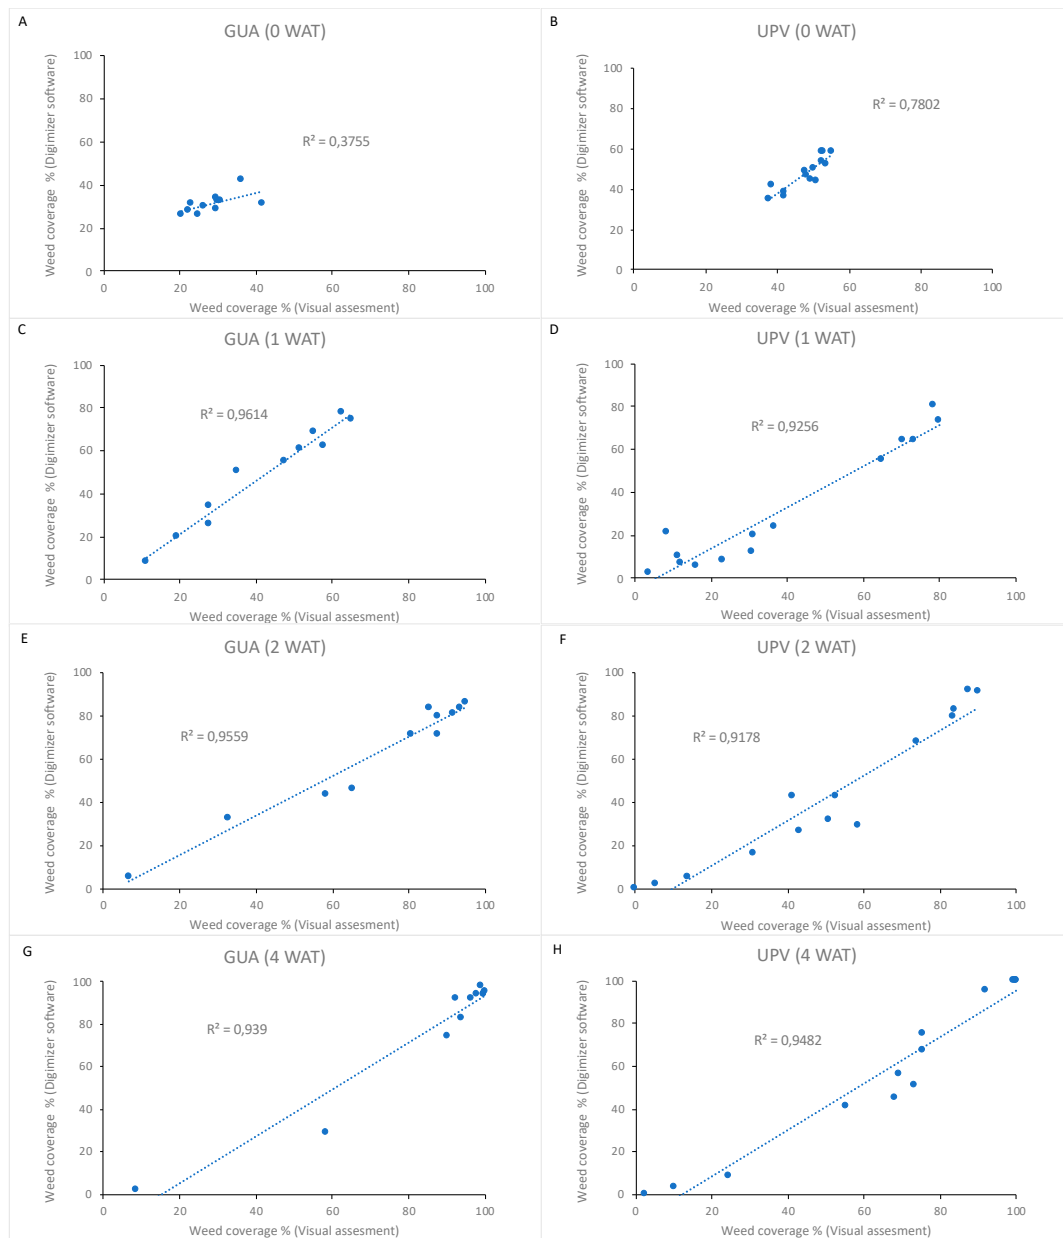

**Figure S2.** Correlation between weed coverage assessment methods (Digital image analysis software vs visual score).
